# Supplementary material for: Unusual crystalline morphology of Poly Aryl Ether Ketones (PAEKs)
Source: Royal Society of Chemistry journal article supplement (doi:10.1039/c5ra17110e), 2015-12-22
Supplement: c5ra17110e1.pdf [file c5ra17110e1.pdf]

## Unusual crystalline morphology of Poly Aryl Ether Ketones (PAEKs)

Yuan Wang<sup>a\*</sup>, James D. Beard<sup>a</sup>, K.E. Evans<sup>a</sup>, Oana Ghita<sup>a</sup>

a. College of Engineering, Mathematics and Physical Sciences, University of Exeter, North Park Road, EX4 4QF, UK

Correspondence to: Yuan Wang (E-mail: [y.wang@exeter.ac.uk](mailto:y.wang@exeter.ac.uk))

DSC of PEEK 150PF powder, laser sintered PEEK 150PF, PEEK 450PF, PEK HP3 and injection moulded PEK HT G22.

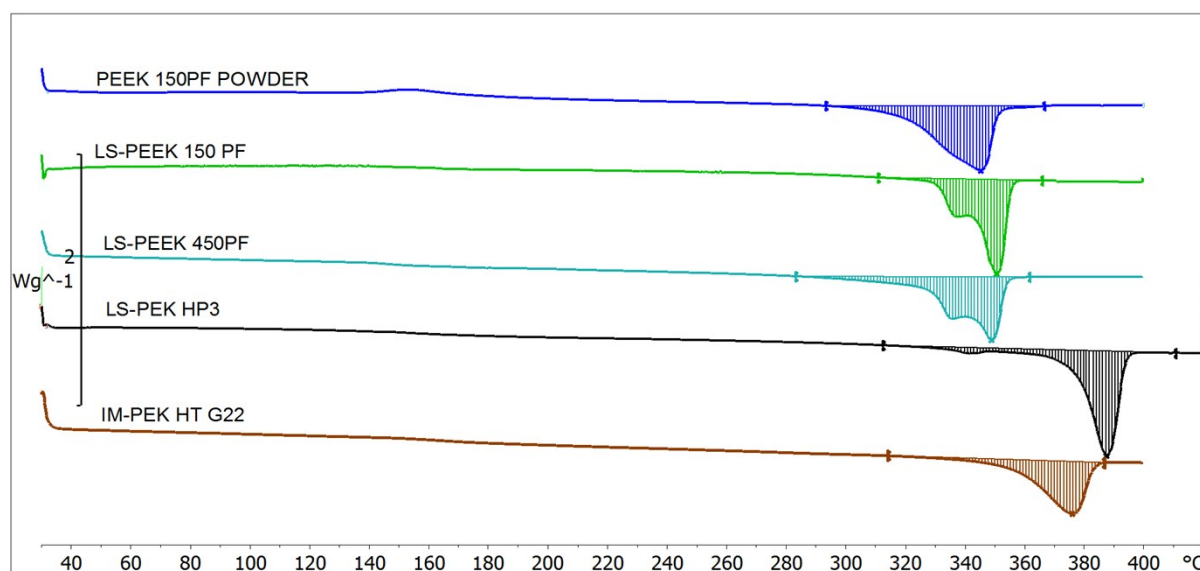

Although the PEEK 150 powder does not show distinguishable double melting peaks as Laser sintered 150PF, it has a broad melting peak with non-symmetric shape. The broad melting range suggests the possible presents of highly overlapped melting peaks. The same result is observed in the injection moulded PEK HT G22.
